# Supplementary material
Source: PubMed Central journal article supplement (PMC4188994)
Supplement: supp_M113.034942_mcp.M113.034942-8.pdf [file supp_M113.034942_mcp.M113.034942-8.pdf]

**Supplemental Data 8**  
**Clinical Data**

| Patient Information |        |                          | Tumour characteristics |     |    |    |    |       | Sample set |   |   |
|---------------------|--------|--------------------------|------------------------|-----|----|----|----|-------|------------|---|---|
| ID                  | Gender | Age at time of operation | T                      | N   | V  | L  | R  | G     | 1          | 2 | 3 |
| 1                   | male   | 42                       | pT2                    | pN1 | V1 | L0 | R0 | G3/G4 | X          | X |   |
| 2                   | female | 46                       | pT2                    | pN1 | V0 | L0 | R0 | G2    | X          | X |   |
| 3                   | female | 70                       | pT4                    | pNx | V0 | L0 | R0 | G2    |            | X |   |
| 4                   | male   | 56                       | pT1                    | pNx | V0 | L0 | R0 | G2    |            | X |   |
| 5                   | male   | 31                       | pT1                    | pNx | V0 | L0 | R0 | G2    |            | X |   |
| 6                   | female | 62                       | pT1                    | pNx | V0 | L0 | R0 | G2    | X          | X |   |
| 7                   | female | 77                       | pT1                    | pNx | V0 | L0 | R0 | G2    |            | X |   |
| 8                   | male   | 60                       | pT1                    | pN1 | V0 | L0 | R0 | G2    |            | X |   |
| 9                   | female | 78                       | pT2                    | pN0 | V0 | L0 | R1 | G2    | X          | X |   |
| 10                  | male   | 68                       | pT2                    | pN0 | V1 | L0 | R0 | G2    |            | X |   |
| 11                  | female | 77                       | pT2                    | pNx | V1 | L0 | R0 | G3/G4 |            | X |   |
| 12                  | female | 70                       | pT1                    | pNx | V0 | L0 | R1 | G1    | X          | X |   |
| 13                  | female | 59                       | pTx                    | pNx | Vx | Lx | Rx | G2    |            | X |   |
| 14                  | male   | 55                       | pT2                    | pNx | V0 | L0 | R0 | G2    |            | X |   |
| 15                  | male   | 74                       | pT3                    | pN0 | V0 | L0 | R0 | G2    | X          |   |   |
| 16                  | female | 60                       | pT1                    | pNx | V0 | L0 | Rx | G2    | X          |   |   |
| 17                  | female | 62                       | pT2                    | pNx | V0 | L0 | R0 | G2    | X          |   |   |
| 18                  | female | 67                       | pT3                    | pN0 | V1 | L1 | Rx | G3/G4 |            |   | X |
| 19                  | female | 45                       | pT1                    | pN0 | V0 | L0 | R0 | G3/G4 |            |   | X |
| 20                  | female | 63                       | pT1                    | pNx | V0 | L0 | R0 | G2    |            |   | X |
| 21                  | male   | 60                       | pT3                    | pNx | V0 | L1 | R1 | G2    |            |   | X |
| 22                  | female | 52                       | pT3                    | pN1 | V0 | L1 | R0 | G2    |            |   | X |
| 23                  | female | 68                       | pT4                    | pNx | V0 | L1 | Rx | G2    |            |   | X |
| 24                  | female | 61                       | pT4                    | pN1 | V0 | L1 | R1 | G2    |            |   | X |
| 25                  | male   | 59                       | pT2                    | pNx | V1 | L1 | R0 | G3/G4 |            |   | X |
| 26                  | female | 65                       | pT1                    | pNx | V0 | L0 | R0 | G3/G4 |            |   | X |
| 27                  | male   | 68                       | pT2                    | pNx | V1 | L1 | R0 | G3/G4 |            |   | X |
| 28                  | male   | 51                       | pT2                    | pNx | V0 | L0 | R0 | G2    |            |   | X |
| 29                  | female | 71                       | pT3                    | pN0 | V0 | L0 | R1 | G3/G4 |            |   | X |
| 30                  | female | 65                       | pT4                    | pNx | V0 | L0 | R0 | G2    |            |   | X |
| 31                  | female | 71                       | pT2                    | pNx | V0 | L0 | R0 | G2    |            |   | X |
| 32                  | male   | 28                       | pT3                    | pN0 | V0 | L0 | R0 | G2    |            |   | X |
| 33                  | male   | 52                       | pT2                    | pNx | V1 | L0 | R0 | G3/G4 |            |   | X |
| 34                  | male   | 65                       | pT2                    | pN0 | V0 | L0 | R0 | Gx    |            |   | X |
| 35                  | female | 38                       | pT3                    | pN1 | V0 | L1 | R1 | G2    |            |   | X |
| 36                  | female | 60                       | pT3                    | pN0 | V0 | L0 | R1 | G3/G4 |            |   | X |
| 37                  | male   | 73                       | pT1                    | pNx | V0 | L0 | R0 | G2    |            |   | X |
| 38                  | female | 61                       | pT2                    | pN0 | V0 | L0 | R1 | Gx    |            |   | X |
| 39                  | female | 68                       | pT2                    | pN1 | V0 | L0 | R0 | G2    |            |   | X |
| 40                  | female | 47                       | pT2                    | pN1 | V1 | L0 | R0 | G3/G4 |            |   | X |
| 41                  | female | 63                       | pTx                    | pNx | Vx | Lx | Rx | Gx    |            |   | X |
| 42                  | female | 76                       | pT3                    | pNx | V0 | L0 | R0 | G2    |            |   | X |
| 43                  | male   | 65                       | pT3                    | pN0 | V0 | L0 | R0 | G3/G4 |            |   | X |
| 44                  | female | 76                       | pT2                    | pN1 | V1 | L1 | R1 | G3/G4 |            |   | X |
| 45                  | female | 72                       | pT1                    | pNx | V0 | L0 | R0 | G2    |            |   | X |
| 46                  | male   | 61                       | pT2                    | pN1 | V1 | L1 | R1 | G2    |            |   | X |
| 47                  | male   | 62                       | pT3                    | pN0 | V0 | L0 | R1 | G2    |            |   | X |
| 48                  | female | 58                       | pT3                    | pN0 | V0 | L1 | R0 | G2    |            |   | X |
| 49                  | female | 60                       | pT2                    | pN1 | V1 | L0 | R0 | G2    |            |   | X |
| 50                  | female | 77                       | pT1                    | pNx | V0 | L1 | R0 | G2    |            |   | X |
| 51                  | male   | 67                       | pT2                    | pN0 | V0 | L0 | Rx | G2    |            |   | X |
| 52                  | female | 62                       | pT2                    | pN0 | V1 | L0 | R0 | G3/G4 |            |   | X |
| 53                  | female | 67                       | pT3                    | pN0 | V1 | L0 | Rx | G2    |            |   | X |
| 54                  | female | 50                       | pT3                    | pN0 | V0 | L1 | R0 | G2    |            |   | X |
| 55                  | female | 61                       | pT1                    | pN0 | V0 | L0 | R1 | G2    |            |   | X |
| 56                  | male   | 37                       | pT2                    | pN1 | V0 | L1 | R0 | G2    |            |   | X |
| 57                  | male   | 77                       | pT2                    | pNx | V1 | L0 | R0 | G2    |            |   | X |
| 58                  | female | 62                       | pT1                    | pNx | V0 | L0 | R0 | G2    |            |   | X |
| 59                  | male   | 56                       | pT1                    | pNx | V0 | L0 | Rx | G2    |            |   | X |
| 60                  | female | 70                       | pT1                    | pN0 | V0 | L0 | R0 | G2    |            |   | X |
| 61                  | female | 43                       | pT1                    | pNx | V0 | L0 | R1 | G2    |            |   | X |
| 62                  | male   | 67                       | pT1                    | pN0 | V0 | L0 | R0 | G2    |            |   | X |
| 63                  | male   | 59                       | pT1                    | pN0 | V0 | L0 | R0 | G3/G4 |            |   | X |
| 64                  | female | 68                       | pT1                    | pN1 | V0 | L0 | R0 | G3/G4 |            |   | X |
| 65                  | female | 64                       | pT2                    | pN1 | V0 | L0 | R0 | Gx    |            |   | X |
| 66                  | male   | 73                       | pT3                    | pNx | V0 | L0 | R0 | G2    |            |   | X |
| 67                  | female | 77                       | pT4                    | pN1 | V0 | L0 | R1 | G2    |            |   | X |
| 68                  | female | 58                       | pT3                    | pN1 | V0 | L1 | R1 | G2    |            |   | X |
| 69                  | male   | 76                       | pT1                    | pN0 | V0 | L0 | R0 | G2    |            |   | X |
| 70                  | male   | 59                       | pT4                    | pN1 | V1 | L1 | R0 | G3/G4 |            |   | X |
| 71                  | female | 75                       | pT1                    | pNx | V0 | L0 | R0 | G2    |            |   | X |
| 72                  | male   | 81                       | pT1                    | pN0 | V0 | L0 | Rx | G2    |            |   | X |
| 73                  | male   | 66                       | pT1                    | pN0 | V0 | L0 | R0 | G3/G4 |            |   | X |
| 74                  | female | 55                       | pT1                    | pN1 | V0 | L0 | R0 | G2    |            |   | X |
| 75                  | female | 67                       | pT1                    | pNx | V0 | L0 | R0 | G2    |            |   | X |
| 76                  | female | 53                       | pT1                    | pNx | V0 | L0 | R0 | Gx    |            |   | X |
| 77                  | female | 75                       | pT1                    | pNx | V0 | L0 | R0 | G2    |            |   | X |

| Staging and grading system for cholangiocellular carcinoma <sup>1</sup> |                                                                                                |
|-------------------------------------------------------------------------|------------------------------------------------------------------------------------------------|
| <b>T</b>                                                                | <b>Tumour stage (extent of primary tumour)</b>                                                 |
| Tx                                                                      | Primary tumour cannot be assessed                                                              |
| T1                                                                      | Solitary tumour without vascular invasion                                                      |
| T2                                                                      | Solitary tumour with vascular invasion or multiple tumours with or without vascular invasion   |
| T3                                                                      | Tumour perforates the visceral peritoneum or directly invades adjacent extrahepatic structures |
| T4                                                                      | Tumour with periductal invasion (periductal growth pattern)                                    |
| <b>N</b>                                                                | <b>Lymph node status (regional lymph node metastasis)</b>                                      |
| Nx                                                                      | Regional lymph nodes cannot be assessed                                                        |
| N0                                                                      | No regional lymph node metastasis                                                              |
| N1                                                                      | Regional lymph node metastasis                                                                 |
| <b>V</b>                                                                | <b>Venous invasion</b>                                                                         |
| Vx                                                                      | Venous invasion cannot be assessed                                                             |
| V0                                                                      | No venous invasion                                                                             |
| V1                                                                      | Microscopic venous invasion                                                                    |
| V2                                                                      | Macroscopic venous invasion                                                                    |
| <b>L</b>                                                                | <b>Lymphatic invasion</b>                                                                      |
| Lx                                                                      | Lymphatic invasion cannot be assessed                                                          |
| L0                                                                      | No lymphatic invasion                                                                          |
| L1                                                                      | Lymphatic invasion                                                                             |
| <b>R</b>                                                                | <b>Residual tumour after treatment</b>                                                         |
| Rx                                                                      | Presence of residual tumour cannot be assessed                                                 |
| R0                                                                      | No residual tumour                                                                             |
| R1                                                                      | Microscopic residual tumour                                                                    |
| R2                                                                      | Macroscopic residual tumour                                                                    |
| <b>G</b>                                                                | <b>Histopathological grading</b>                                                               |
| Gx                                                                      | Grade of differentiation cannot be assessed                                                    |
| G1                                                                      | Well differentiated (low grade)                                                                |
| G2                                                                      | Moderately differentiated (intermediate grade)                                                 |
| G3                                                                      | Poorly differentiated (high grade)                                                             |
| G4                                                                      | Undifferentiated (high grade)                                                                  |

1. Sobin, L., Gospodarowicz, M. and Wittekind, C. (eds.) (2009) Liver – Intrahepatic Bile Ducts, IN: TNM Classification of Malignant Tumours, 7th Ed., pp:114-117, UICC, Wiley-Blackwell, Hoboken, New Jersey, USA.
