# Supplementary material
Source: PubMed Central journal article supplement (PMC4188994)
Supplement: supp_M113.034942_mcp.M113.034942-9.pdf [file supp_M113.034942_mcp.M113.034942-9.pdf]

**Supplemental Data 9**  
**Antibodies used for the immunohistochemical verification**

| <b>Antibody</b> | <b>Clone</b>    | <b>Distributor/Product No.</b> | <b>AB dilution, conditions</b> |
|-----------------|-----------------|--------------------------------|--------------------------------|
| GSN             | GS-2C4/Ms       | Sigma/G4896                    | 1:3000, 30 min. RT             |
| STIP1           | EPR6606/Rb      | abcam/ab126753                 | 1:100, 30 min. RT              |
| SFN             | poly/Rb         | Imgenex/IMG-6746A              | 1:100, 30 min. RT              |
| PKM2            | poly/Rb         | abcam/ab131021                 | 1:4000, 30 min. RT             |
| SERPINH1        | M16.10A1/Ms     | abcam/ab13510                  | 1:12.000, 30 min. RT           |
| CLIC1           | 2D4/Ms          | Abnova/H00001192-M01           | 1:9000, 30 min. RT             |
| APOA4           | 1D6B6,1D4C11/Ms | abcam/ab81616                  | 1:30.000, 30 min. RT           |
| PPA1            | poly/Rb         | abcam/ab96099                  | 1:500, 30 min. RT              |
| FABP1           | 2G4/Ms          | Acris/AM09011PU-S              | 1:15.000, 30 min. RT           |
| BHMT            | EPR6782/Rb      | abcam/ab124992                 | 1:100, 30min. RT               |

Rb: produced in rabbit; Ms: produced in mouse.
